# Supplementary material
Source: PubMed Central journal article supplement (PMC6919242)
Supplement: Supp_Table1.pdf [file Supp_Table1.pdf]

## Supplementary Data

**Supplementary Table S1.** *GLP-grade scAAV9-CB-IGF1 quality control data*

| <i>Test</i>            | <i>Result</i>                                                    | <i>Test</i>               | <i>Result</i>               |
|------------------------|------------------------------------------------------------------|---------------------------|-----------------------------|
| Particle titer (vg/mL) | ITR-qPCR: $1.0 \times 10^{13}$<br>Dot blot: $1.5 \times 10^{13}$ | Residual plasmid DNA      | 400 pg/10 <sup>9</sup> vg   |
| Infectious titer       | $7.7 \times 10^9$ IU/mL                                          | Residual Benzonase        | <0.01 pg/10 <sup>9</sup> vg |
| Filled capsids (TEM)   | 82% full                                                         | Adventitious virus        | Negative                    |
| SDS-PAGE/Western blot  | Correct MW: VP1, VP2, and VP3                                    | Replication competent AAV | Negative                    |
| SDS-PAGE/silver stain  | Correct MW: VP1, VP2, and VP3                                    | Endotoxin                 | <0.5 EU/mL                  |
| pH                     | 7.4                                                              | Mycoplasma                | Negative                    |
| Residual cell protein  | <11 ng/mL                                                        | Sterility <USP 71>        | No growth                   |
| Residual host cell DNA | 5.6 ng/mL                                                        |                           |                             |

AAV, adeno-associated virus; EU, endotoxin units; ITR, inverted terminal repeats; IU, infectious units; MW, molecular weight; qPCR, quantitative PCR; SDS-PAGE, sodium dodecyl sulfate–polyacrylamide gel electrophoresis; pg, picograms; TEM, transmission electron microscopy; vg, vector genomes.
